# Supplementary material for: Odor-dependent temporal dynamics in Caenorhabitis elegans adaptation and aversive learning behavior
Source: PeerJ. 2018 Jun 12;6:e4956. doi: 10.7717/peerj.4956 (PMC6003392; doi:10.7717/peerj.4956)
Supplement: Data S5 — Attraction index for each trial is indicated. [file peerj-06-4956-s013.xlsx]

## Sheet: Fig S2A
		diacetyl	76	6.18241
		1-methylpyrrole	76.25	7.54451
		2-heptanone	76.6667	11.1803
		butanone	80	7.27247
		benzaldehyde	81	6.04612
		1-pentanol	85	10.8562
		2-ethoxythiazole	91	5
		Isoamyl alcohol	91.25	7.89156
		2-methylpyrazine	93.5714	5.40727
		isobutylthiazole	99.2857	5.78595
		2,4,5-trimethylthiazole	100	5.33333
		4-chlorobenzyl mercaptan	105.455	3.05505

## Sheet: Figure S2B
		initial CI	min to 50% behavior change
	4-chlorobenzyl mercaptan	0.8	106						minutes to 50% behavior change	initial AI	error	error
	2,4,5-TMT	0.91	100					early-trending odors	82.125	0.72125	5.84032	0.09778
	isobutylthiazole	0.86	99					late-trending odors	101.667	0.856667	3.09121	0.0449691
	2-methylpyrazine	0.73	94
	2-ethoxythiazole	0.83	91					Late 4 odors	Late 3 odors
	isoamyl alcohol	0.77	91				p=	0.112116	0.0663452
	1-pentanol	0.69	85
	benzaldehyde	0.81	81
	butanone	0.76	80
	heptanone	0.5	77
	methylpyrrole	0.67	76
	diacetyl	0.74	76
	50% behavior change	p=	0.000752453

## Sheet: Fig S6
	min	10	20	30	40	50	60	70	80	90	100	110	120		50% change	original - 50%	time to 50%
희경	20170818	-0.19	0.41	0.63	0.62	0.61	0.58	0.66	0.53	0.39	0.38	0.4	0.17	1/500	0.23	0.4	90		0.63		90
희경	20170822	0.54	0.57	0.54	0.51	0.62	0.8	0.8	0.73	0.66	0.59	0.45	0.38		0.08	0.46	110		0.54		110
희경	20170823	0.92	0.88	0.95	0.95	0.96	0.93	0.9	0.91	0.87	0.91	0.85	0.79		0.08	0.87	110			0.95		110
희경	20170824	0.76	0.91	0.88	0.8	0.73	0.72	0.59	0.49	0.35	0.27	0.26	0.12		0.38	0.5	80			0.88		80
희경	20170828	0.56	0.7	0.79	0.87	0.91	0.92	0.94	0.92	0.86	0.87	0.77	0.73		0.03	0.76	120		0.79		120
soyoung	20170901	1	0.786	0.938	1	0.65	0.727	0.638	0.658	0.733	0.661	0.661	0.25		0.344	0.594	120			0.938		120
해수	20170901	0.8	0.95	0.95	0.91	0.87	0.79	0.86	0.85	0.77	0.69	0.61	0.58		0.185	0.765	100			0.95		100
희경	20170904	0.6	0.9	0.97	1	0.95	0.84	0.96	0.86	0.84	0.66	0.49	0.41		0.28	0.69	100			0.97		100
희경	20170905	0.67	0.73	0.83	0.91	0.97	0.92	0.84	0.67	0.6	0.49	0.26	0.26		0.285	0.545	100		0.83		100								low initial AI	high initial AI		low initial AI	high initial AI		low initial AI	high initial AI	low initial AI	high initial AI
soyoung	20170905	0.5	0.625	0.688	0.739	0.74	0.712	0.715	0.618	0.876	0.253	0.066	0.044		0.322	0.366	100		0.688		100							4-chlorobenzyl mercaptan	0.70975	0.916857	4-chlorobenzyl mercaptan	105	101.429		0.0432049	0.0291589	0	16.7631
해수	20170905	0.63	0.84	0.88	0.93	0.77	0.73	0.69	0.72	0.75	0.58	0.41	0.27		0.305	0.575	110			0.88		110						2,4,5-trimethylthiazole	0.81	0.9444	2,4,5-trimethylthiazole	110	97		0.0882351	0.0425187	10	12.454
희경	20170905	0.63	0.71	0.78	0.89	0.87	0.84	0.8	0.73	0.64	0.31	0.21	0.15		0.315	0.465	100		0.78		100
해수	20170906	0.7	0.88	0.73	0.78	0.71	0.8	0.79	0.74	0.68	0.71	0.62	0.36		0.185	0.545	120		0.73		120
해수	20170913	0.75	0.76	0.69	0.64	0.62	0.65	0.68	0.6	0.33	0.18	-0.04	-0.31		0.5	0.19	100		0.69		100
희경	20170913	0.53	0.82	0.85	0.77	0.78	0.73	0.73	0.75	0.78	0.71	0.77	0.72		0.065	0.785	90			0.85		90
																	105.455	3.05505
		0.626667	0.764733	0.8064	0.821267	0.784	0.779267	0.772867	0.7184	0.675267	0.550933	0.452467	0.328267		0.478133				0.70975	0.916857	105	101.429
		0.0690319	0.0378698	0.0334574	0.037603	0.0335488	0.02607	0.029116	0.0333959	0.0479031	0.0586887	0.0685491	0.0757298						0.0882351	0.0425187	10	12.454
																			p=	0.000151356

## Sheet: Figure 5
		50% behavior change
		methylpyrrole	2-ethoxythiazole	benzaldehyde	2,4,5-TMT	4-CM		early-trending	late-trending		early-trending	late-trending
		120	40	110	110	90		120	110		75	90
		50	80	100	90	110		50	90		70	89
		60	120	60	120	110		60	120		58
		80	80	70	70	80		80	70
		80	90	80	100	120		80	100
		80	110	70	100	120		80	100
		60	100	60	100	100		60	100
		80	110	70	120	100		80	120
			80	110	110	100		40	110
			100	80	110	100		80	110
			91		70	110		120	70
					110	100		80	110
					90	120		90	90
						100		110	90
						90		100	110
			50% animals nuclear EGL-4					110	110
		1-methylpyrrole	75.615					80	80
		Benzaldehyde	70.04					100	120
		2-ethoxythiazole	57.895					91	120
		4-chlorobenzylmercaptan	89.531					110	100
		2,4,5-TMT	88.752					100	100
								60	100
								70	100
								80	110
								70	100
								60	120
								70	100
								110	90
								80
								early-trending	late-trending		early-trending	late-trending
							avg	83.4828	101.786		67.6667	89.5
							median	80	100
							ste	3.88715	2.62535		8.73689	0.707107
						T-test	p=	0.000286211	0.0441487
						ANOVA	p=	0.000286211	0.0441487

## Sheet: anova-beh
	early-trending	late-trending
	120	110
	50	90								Anova: Single Factor
	60	120
	80	70								SUMMARY
	80	100								Groups	Count	Sum	Average	Variance
	80	100								Column 1	29	2421	83.4828	438.187
	60	100								Column 2	28	2850	101.786	192.989
	80	120
	40	110
	80	110								ANOVA
	120	70								Source of Variation	SS	df	MS	F	P-value	F crit
	80	110								Between Groups	4772.25	1	4772.25	15.0157	0.000286211	4.0162
	90	90								Within Groups	17480	55	317.817
	110	90
	100	110								Total	22252.2	56
	110	110
	80	80
	100	120
	91	120
	110	100
	100	100
	60	100
	70	100
	80	110
	70	100
	60	120
	70	100
	110	90
	80

## Sheet: anova-nuc
		early-trending	late-trending
		75	90
		70	89							Anova: Single Factor
		58
										SUMMARY
										Groups	Count	Sum	Average	Variance
										Column 1	3	203	67.6667	76.3333
										Column 2	2	179	89.5	0.5
										ANOVA
										Source of Variation	SS	df	MS	F	P-value	F crit
										Between Groups	572.033	1	572.033	11.2041	0.0441487	10.128
										Within Groups	153.167	3	51.0556
										Total	725.2	4

## Sheet: butanone(N2)
	min	10	20	30	40	50	60	70	80	90	100	110	120		50% change	original - 50%	time to 50%
	20170707	0.5	0.5	0.63	0.77	0.3	0.02	0.08	0.11	-0.1	0.02	-0.19	-0.18		0.405	0.225	60
	20170802	-0.16	-0.11	0.375	0.46	0.6	0.66	0.67	0.15	0.09	-0.07	-0.11	-0.15		0.2625	0.1125	90
희경	20170807	0.6	0.53	0.82	0.64	0.57	0.43	0.5	0.45	0.31	0	-0.45	-0.45		0.635	0.185	100
희경	20170811	0.6	0.45	0.67	0.47	0.68	0.69	0.73	0.65	0.5	0.5	0.39	0.31		0.18	0.49	40
해수	20170907	0.5	1	0.83	0.75	0.76	0.65	0.54	0.69	0.68	0.62	0.39	0.48		0.175	0.655	60
희경	20170911	0.64	0.87	0.83	0.87	0.95	0.91	0.92	0.69	0.65	0.66	0.54	0.58		0.125	0.705	60
해수	20170912	0.57	0.83	0.89	0.88	0.84	0.83	0.86	0.86	0.72	0.65	0.63	0.48		0.205	0.685	100
soyoung		0.682	0.773	0.769	0.79	0.894	0.712	0.558	0.518	0.463	0.173	0.478	0.553		0.108	0.661	70
희경	20170915	0.67	0.67	0.81	0.73	0.72	0.55	0.43	0.45	0.34	0.17	-0.04	-0.24		0.525	0.285	100
희경	20170913	0.57	0.77	0.87	0.91	0.9	0.86	0.81	0.73	0.61	0.56	0.48	0.37		0.25	0.62	90
해수	20170911	0.85	0.75	0.91	0.77	0.78	0.75	0.74	0.68	0.64	0.54	0.26	0.12		0.395	0.515	110
																	80	7.27247
		0.547455	0.639364	0.764	0.730909	0.726727	0.642	0.621636	0.543455	0.445727	0.347545	0.216182	0.170273

## Sheet: diacetyl(N2)
	min	10	20	30	40	50	60	70	80	90	100	110	120		50% change	original - 50%	time to 50%
	20170707	0.5	0.82	0.77	0.86	0.51	0.53	0.53	0.43	0.19	0.1	0.28	0.21		0.28	0.49	80
	20170727	0.75	0.8	0.9	0.87	0.93	0.84	0.82	0.81	0.78	0.68	0.52	0.45		0.225	0.675	100
해수	20170729	0.44	0.7	0.5	0.88	0.5	0.27	0	0.5	0.38	0.5	0.4	0.29		0.105	0.395	60
해수	20170731	0.15	0.54	0.58	0.73	0.79	0.7	0.68	0.3	0.25	0.18	0.19	-0.06		0.32	0.26	80
	20170731	0.7	0.69	0.64	0.79	0.71	0.67	0.49	0.49	0.41	0.23	0.32	0.31		0.165	0.475	90
	20170802	0.55	0.66	0.76	0.85	0.43	0.39	0.36	0.29	0.18	0.15	-0.08	-0.11		0.435	0.325	80
해수	20170912	0.66	0.77	0.72	0.79	0.78	0.81	0.69	0.56	0.38	0.5	0.38	0.37		0.175	0.545	90
soyoung	20170926	0	0.75	0.9	0.814	0.863	0.784	0.847	0.854	0.622	0.662	0.625	0.677		0.1115	0.7885	30
heekyung	20170919	0.69	0.94	0.86	0.75	0.83	0.66	0.56	0.43	0.29	0.18	0.09	0.14		0.36	0.5	80
해수	20170913	0.35	0.52	0.73	0.73	0.77	0.52	0.2	0.2	0.22	0.27	0.28	0.21		0.26	0.47	70
																0	76	6.18241
		0.479	0.719	0.736	0.8064	0.7113	0.6174	0.5177	0.4864	0.3702	0.3452	0.3005	0.2487

## Sheet: Isoamyl alcohol(N2)
	min	10	20	30	40	50	60	70	80	90	100	110	120				min	10	20	30	40	50	60	70	80	90	100	110	120		50% change	original - 50%	time to 50%
희경	20170811	0.52	0.7	0.96	0.91	0.92	0.92	0.93	0.96	0.94	0.94	0.93	0.93	1/100		해수	20170907	0.5	0.75	0.5	0.62	0.6	0.62	0.77	0.78	0.75	0.56	0.41	0.22		0.14	0.36	110
	20170829															희경	20170911	0.48	0.64	0.88	0.91	0.69	0.61	0.58	0.42	0.32	0.25	0.28	0.14		0.37	0.51	80
																해수	20170912	0.64	0.79	0.89	0.9	0.96	0.86	0.82	0.77	0.72	0.62	0.56	0.54		0.175	0.715	90
																																0
																희경	20170919	0.66	0.83	0.84	0.83	0.82	0.83	0.8	0.81	0.77	0.78	0.76	0.64		0.1	0.74	120
																희경	20170915	0.68	0.82	0.77	0.92	0.94	0.89	0.82	0.83	0.69	0.78	0.64	0.6		0.085	0.685	90
																희경	20170913	0.6	0.83	0.87	0.74	0.76	0.61	0.54	0.46	0.45	0.35	0.26	0.16		0.355	0.515	80
		0.52	0.7	0.96	0.91	0.92	0.92	0.93	0.96	0.94	0.94	0.93	0.93			해수	20170914	0.77	0.81	0.86	0.94	0.92	0.9	0.91	0.97	0.74	0.68	0.52	0.35		0.255	0.605	110
																해수	20170913	0.67	0.66	0.56	0.35	0.29	0.42	0.37	0.47	0.23	0.26	0.29	0.1		0.23	0.33	50
																																0	91.25	7.89156
																		0.625	0.76625	0.77125	0.77625	0.7475	0.7175	0.70125	0.68875	0.58375	0.535	0.465	0.34375
	min	10	20	30	40	50	60	70	80	90	100	110	120
	20170822	-0.5	0	0.4	0.5	0.11	0.09	0.18	0.13	0.13	-0.05	-0.06	-0.35	1/50000
		-0.5	0	0.4	0.5	0.11	0.09	0.18	0.13	0.13	-0.05	-0.06	-0.35
	min	10	20	30	40	50	60	70	80	90	100	110	120
해수	20170906	0.75	0.96	0.84	0.82	0.8	0.8	0.88	0.9	0.89	0.92	0.89	0.86	1/5000
희경	20170906	0.96	0.96	0.96	0.97	0.97	0.93	0.89	0.89	0.91	0.9	0.9	0.9
																																		20170926	0	0	0	0.78	0.569	0.726	0.713	0.739	0.801	0.795	0.736	0.583
		0.855	0.96	0.9	0.895	0.885	0.865	0.885	0.895	0.9	0.91	0.895	0.88																					7.89156
																																			0.0005	-0.002875	-0.003	-0.001625	-0.00125	-0.0105	-0.004875	-0.007	-0.012125

## Sheet: 2-hepatonone
	min	10	20	30	40	50	60	70	80	90	100	110	120		50% change	original - 50%	time to 50%
														1/1000		0
해수	20170906	0.5	0.08	0.14	0.17	0.33	0.25	0.13	0.3	0.23	0.33	0.02	0.16		0.005	0.165	70
haesoo	20171031	0.61	0.64	0.74	0.85	0.91	1	0.56	0.44	0.04	-0.09	-0.08	-0.16		0.45	0.29	90
							0.432	0.468	0.42	0.315	0.563	0.309	0.138
soyoung	20171013	0	0.833	0.75	0.5	0.722	0.5	0.575	0.568	0.271	0.087	0.211	0.433		0.1585	0.5915	40
희경	20170914	0.49	0.29	0.32	0.29	0.36	0.4	0.25	0.23	0.14	-0.28	-0.22	-0.18		0.25	0.07	100
해수	20170911	0.5	0.5	0.37	0.33	0.38	0.23	0.39	0.48	0.25	0.26	0.15	-0.16		0.265	0.105	120
heekyung	20171031			0.75	0.78	0.56	0.53	0.5	0.4	0.5	0.26	0.3	0.5		0.125	0.625	50
haesoo	20171116					0.42	0.3	0.1	0.14	0.13	-0.05	0.01	-0.07		0.245	0.175	70
soyoung	20171114							0.587	0.562	0.449	0.634	0.354	0.39
heekyung	20171115			0.5	0.4	0.34	0.28	0.11	0.17	-0.03	-0.16	-0.1	-0.22		0.36	0.14	70
heekyung	20171114			0.59	0.171	0.5	0.56	0.32	0.17	0.04	0.06	-0.03	-0.05		0.32	0.27	40
heekyung	20171113			0.36	0.39	0.59	0.74	0.5	0.41	0.17	0.17	0.03	-0.1		0.23	0.13	110
																	76.6667	11.1803
		0.42	0.4686	0.502222	0.431222	0.5112	0.474727	0.374167	0.3575	0.20875	0.148667	0.0795	0.05675
		0.107285	0.131541	0.0735183	0.0808434	0.0598823	0.0702915	0.0539226	0.043831	0.0465677	0.0803625	0.0528774	0.0751255

[truncated: 8 more sheets: 4-chlorobenzyl mercaptan, 2,4,5-Trimethylthiazole(N2), 2-Ethoxythiazole(N2), 1-Metylpyrrole(N2), Benzaldehyde, 1-pentanol(N2), 2-methylpyrazine, Isobutylthiazole]
