# Supplementary material for: Odor-dependent temporal dynamics in Caenorhabitis elegans adaptation and aversive learning behavior
Source: PeerJ. 2018 Jun 12;6:e4956. doi: 10.7717/peerj.4956 (PMC6003392; doi:10.7717/peerj.4956)
Supplement: Data S6 — Raw data for Figs. S7 and S8. [file peerj-06-4956-s014.xlsx]

## Sheet: 140 minutes
	2,4,5-trimethylthiazole	4-chlorobenzyl mercaptan
0	7.77778	8.33333		1.46986	2.41
20	13.7444	10.625		5.25397	2.98552
40	21.875	19.3333		5.89624	3.01344
60	37.3333	26.8333		7.57004	4.53911
80	47	44		7.97043	6.2837
100	51.7778	58.0833		5.05189	5.56022
120	60.125	64.4167		6.33989	6.0771
140	65	53.3333		7.07107	6.91215

## Sheet: Bz vs 4-CB
Benz		1:5000	1:10000	1:5000	1:10000										Benz 1:1000	Benz 1:5000	Benz 1:10000	4-CB 1:1000	4-CB 1:5000	4-CB 1:10000
	20	20	13.75	7	10.625									20	6.66667	20	13.75	2	7	10.625
	40	16.6667	25	8	19.3333									40	18.3333	16.6667	25	4	8	19.3333
	60	40.8333	44.375	34	26.8333									60	21.6667	40.8333	44.375	2	34	26.8333
	80	52.1667	55.625	44	44									80	47.5	52.1667	55.625	24	44	44
	100	64.1667	68.125	52	58.0833									100	44.5	64.1667	68.125	24	52	58.0833
	120	72	70	61	64.4167									120	70	72	70	38	61	64.4167
	20	11.4746	2.95048	5.83095	2.98552									20	4.77261	11.4746	2.95048	1.22474	5.83095	2.98552
	40	5.57773	6.54654	3.74166	3.01344									40	9.80363	5.57773	6.54654	1.87083	3.74166	3.01344
	60	10.3615	10.0195	12.8841	4.53911									60	11.1555	10.3615	10.0195	2	12.8841	4.53911
	80	6.68539	8.09748	14.6969	6.2837									80	13.4009	6.68539	8.09748	11.3358	14.6969	6.2837
	100	7.57371	8.9611	12.51	5.56022									100	14.6828	7.57371	8.9611	16	12.51	5.56022
	120	8.88819	8.72872	6	6.0771									120	15.384	8.88819	8.72872	17.2192	6	6.0771

## Sheet: Benzaldehyde
		20171106	20171107	20171113	20171114	20171121	20171120	20171117	20171116
	0	10	10	0	10	10	5	15	5		8.125	1.6195
	20	15	20	20	15	5	0	10	25		13.75	2.95048
	40	55	50	25	25	20	5	10	10		25	6.54654
	60	80	80	70	35	40	15	15	20		44.375	10.0195
	80	90	90	30	50	45	60	40	40		55.625	8.09748
	100	90	100	55	80	45	85	25	65		68.125	8.9611
	120	95		90	85	50	55	35	80		70	8.72872
						formula				x	x*20
					50% nuclear	0.0308x4 - 1.1348x3 + 10.026x2 - 17.514x + 16.786				4.485	69.7

## Sheet: Benz 5000
	171204	171130	171129	171128	171124	171205
0	10	10	10	10	10	10			10
20	0	15	0	35	0	70			20	11.4746
40	5	20	5	30	5	35			16.6667	5.57773
60	5	65	50	65	15	45			40.8333	10.3615
80	75	60	50	60	30	38			52.1667	6.68539
100	75	55	90	65	35	65			64.1667	7.57371
120	65		85	100	55	55			72	8.88819

## Sheet: Benz 1000
		171204	171130	171129	171128	171124	171205
	0	10	10	10	10	10	10		10	0
	20	0	5	0	30	5	0		6.66667	4.77261
	40	0	35	5	60	5	5		18.3333	9.80363
	60	0	35	5	70	20	0		21.6667	11.1555
	80	0	35	85	75	25	65		47.5	13.4009
	100	0	25	50	82	20	90		44.5	14.6828
	120	0	85	100	95	85	55		70	15.384

## Sheet: 4-chlorobenzyl mercaptan
c
		20171113	20171108	20171115	20171114	20171121	20171121a	20171120	20171117	20171116	20171124	20171129	20171128
	0	0	10	10	10	5	5	10	5	15	0	0	30		8.33333	2.41
	20	5	12.5	0	15	20	0	0	0	5	20	20	30		10.625	2.98552
	40	20	22	20	20	10	10	25	5	10	45	20	25		19.3333	3.01344
	60	5	58	20	20	14	10	35	30	20	50	25	35		26.8333	4.53911
	80	50	85	20	40	20	38	35	30	25	70	75	40		44	6.2837
	100	45	95	45	65	64	63	75	30	40	75	35	65		58.0833	5.56022
	120	55	95	90	60	75	45	40	30	50	70	75	88		64.4167	6.0771
	140					70	50	45	25	65	65				53.3333	6.91215
										formula				x	x*20
									50% nuclear	-0.1454x4 + 1.8802x3 - 6.4253x2 + 11.766x + 1.0536				5.422	88.44
			x	original y	ajdust y
			0	0	17.5
			0	10	42.54
			0	10	42.54
			0	10	42.54
			0	5	43.6725
			0	5	43.6725
			0	10	42.54
			0	5	43.6725
			0	15	-320.098
			0	0	17.5
			0	0	17.5
			0	30	-6919.04
			20	5
			20	12.5
				0
				15
				20
				0
				0
				0
				5
				20
				20
				30

## Sheet: 4-CB 5000
		171204	171130	171129	171124	171205
	0	10	10	10	10	10		10	0
	20	0	30	0	0	5		7	5.83095
	40	0	20	10	0	10		8	3.74166
	60	65	65	15	20	5		34	12.8841
	80	10	25	55	35	95		44	14.6969
	100	50	35	30	45	100		52	12.51
	120	55	50	80	50	70		61	6

## Sheet: 4-CB 1000
		171204	171130	171129	171124	171205
	0	10	10	10	10	10		10	0
	20	0	0	0	5	5		2	1.22474
	40	0	0	5	5	10		4	1.87083
	60	0	0	0	10	0		2	2
	80	0	35	60	25	0		24	11.3358
	100	0	0	80	40	0		24	16
	120	0	55	90	45	0		38	17.2192

## Sheet: control
2017-11-06	2017-11-07	2017-11-13	2017-11-14	2017-11-15	2017-11-16	2017-11-17	2017-11-20	2017-11-21	2017-11-22	2017-11-23	2017-11-24	2017-11-28	2017-11-29	2017-11-30	2017-12-04	2017-12-05
10	10	0	10	10	15	5	10	5	0	25	0	30	0	15	0	0					8.4375	2.31475
																					#DIV/0!
																					#DIV/0!
																					#DIV/0!
																					#DIV/0!
																					#DIV/0!
