# Supplementary material for: Odor-dependent temporal dynamics in Caenorhabitis elegans adaptation and aversive learning behavior
Source: PeerJ journal article supplement (doi:10.7717/peerj.4956), 2018-06-12

### 4-chlorobenzyl mercaptan

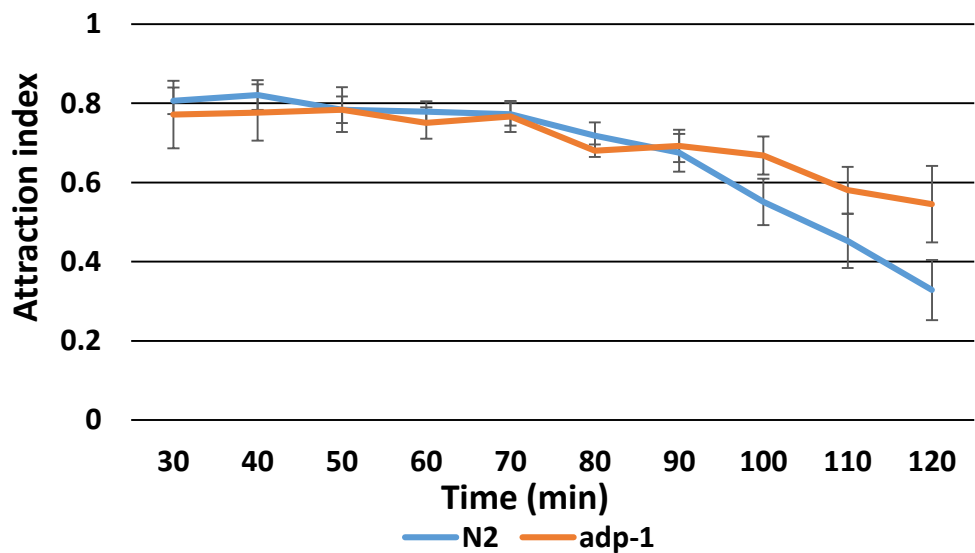

### 2,4,5-trimethylthiazole

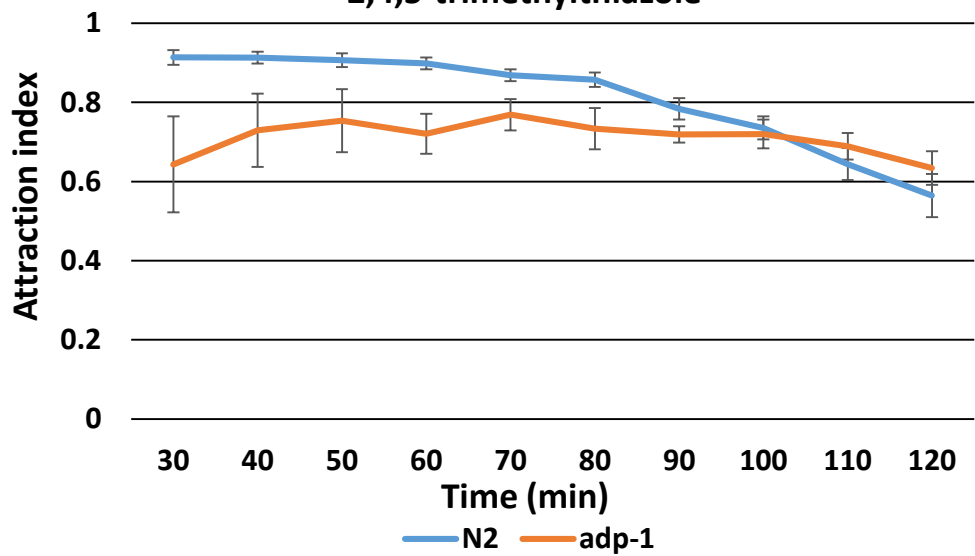

Supplement: Fig_S3.pdf [file Fig_S3.pdf]
