# Supplementary material for: Odor-dependent temporal dynamics in Caenorhabitis elegans adaptation and aversive learning behavior
Source: PubMed Central journal article supplement (PMC6003392; doi:10.7717/peerj.4956), 2018-06-12
Supplement: peerj-06-4956-s001.pdf [file peerj-06-4956-s001.pdf]

| <b>odor</b>                     | <b>wild-type</b>   | <b><i>ceh-36</i></b> | <b><i>odr-7</i></b> | <b><i>ceh-36</i>/WT</b> | <b><i>odr-7</i>/WT</b> |
|---------------------------------|--------------------|----------------------|---------------------|-------------------------|------------------------|
| <b>diacetyl</b>                 | <b>0.90 ± 0.03</b> | <b>0.83 ± 0.04</b>   | <b>0.26 ± 0.02</b>  | <b>92.64%</b>           | <b>28.96%</b>          |
| <b>benzaldehyde</b>             | <b>0.89 ± 0.02</b> | <b>0.03 ± 0.05</b>   | <b>0.88 ± 0.04</b>  | <b>2.78%</b>            | <b>97.38%</b>          |
| <b>butanone</b>                 | <b>0.84 ± 0.03</b> | <b>0.16 ± 0.06</b>   | <b>0.84 ± 0.03</b>  | <b>18.40%</b>           | <b>98.89%</b>          |
| <b>isobutyric acid</b>          | <b>0.71 ± 0.07</b> | <b>0.54 ± 0.07</b>   | <b>0.14 ± 0.06</b>  | <b>76.66%</b>           | <b>19.04%</b>          |
| <b>2-isobutylthiazole</b>       | <b>0.87 ± 0.03</b> | <b>0.11 ± 0.16</b>   | <b>0.75 ± 0.15</b>  | <b>12.28%</b>           | <b>85.52%</b>          |
| <b>dimethylthiazole</b>         | <b>0.92 ± 0.03</b> | <b>0.25 ± 0.15</b>   | <b>0.79 ± 0.11</b>  | <b>27.21%</b>           | <b>85.56%</b>          |
| <b>2,4,5-trimethylthiazole</b>  | <b>0.91 ± 0.03</b> | <b>0.46 ± 0.12</b>   | <b>0.74 ± 0.11</b>  | <b>50.23%</b>           | <b>81.79%</b>          |
| <b>2-methylpyrazine</b>         | <b>0.75 ± 0.05</b> | <b>-0.01 ± 0.16</b>  | <b>0.59 ± 0.14</b>  | <b>-0.98%</b>           | <b>78.58%</b>          |
| <b>2-heptanone</b>              | <b>0.78 ± 0.03</b> | <b>0.10 ± 0.08</b>   | <b>0.79 ± 0.04</b>  | <b>12.58%</b>           | <b>100.80%</b>         |
| <b>1-methylpyrrole</b>          | <b>0.80 ± 0.03</b> | <b>0.10 ± 0.07</b>   | <b>0.68 ± 0.05</b>  | <b>12.53%</b>           | <b>85.10%</b>          |
| <b>4-chlorobenzyl mercaptan</b> | <b>0.73 ± 0.09</b> | <b>0.05 ± 0.14</b>   | <b>0.58 ± 0.17</b>  | <b>6.14%</b>            | <b>79.60%</b>          |
| <b>butyric acid</b>             | <b>0.55 ± 0.09</b> | <b>0.36 ± 0.12</b>   | <b>0.22 ± 0.07</b>  | <b>64.05%</b>           | <b>40.41%</b>          |
| <b>1-pentanol</b>               | <b>0.77 ± 0.05</b> | <b>-0.09 ± 0.07</b>  | <b>0.61 ± 0.07</b>  | <b>-11.48%</b>          | <b>79.05%</b>          |
| <b>benzyl mercaptan</b>         | <b>0.76 ± 0.04</b> | <b>-0.01 ± 0.08</b>  | <b>0.54 ± 0.11</b>  | <b>-1.20%</b>           | <b>71.28%</b>          |
| <b>2-cyclohexylethanol</b>      | <b>0.81 ± 0.05</b> | <b>0.00 ± 0.06</b>   | <b>0.60 ± 0.12</b>  | <b>0.35%</b>            | <b>73.46%</b>          |
| <b>2-ethoxythiazole</b>         | <b>0.81 ± 0.06</b> | <b>0.10 ± 0.10</b>   | <b>0.77 ± 0.05</b>  | <b>12.32%</b>           | <b>94.83%</b>          |
| <b>benzyl proprionate</b>       | <b>0.78 ± 0.05</b> | <b>0.33 ± 0.13</b>   | <b>0.27 ± 0.11</b>  | <b>42.25%</b>           | <b>33.93%</b>          |
