# Supplementary material for: Odor-dependent temporal dynamics in Caenorhabitis elegans adaptation and aversive learning behavior
Source: PubMed Central journal article supplement (PMC6003392; doi:10.7717/peerj.4956), 2018-06-12

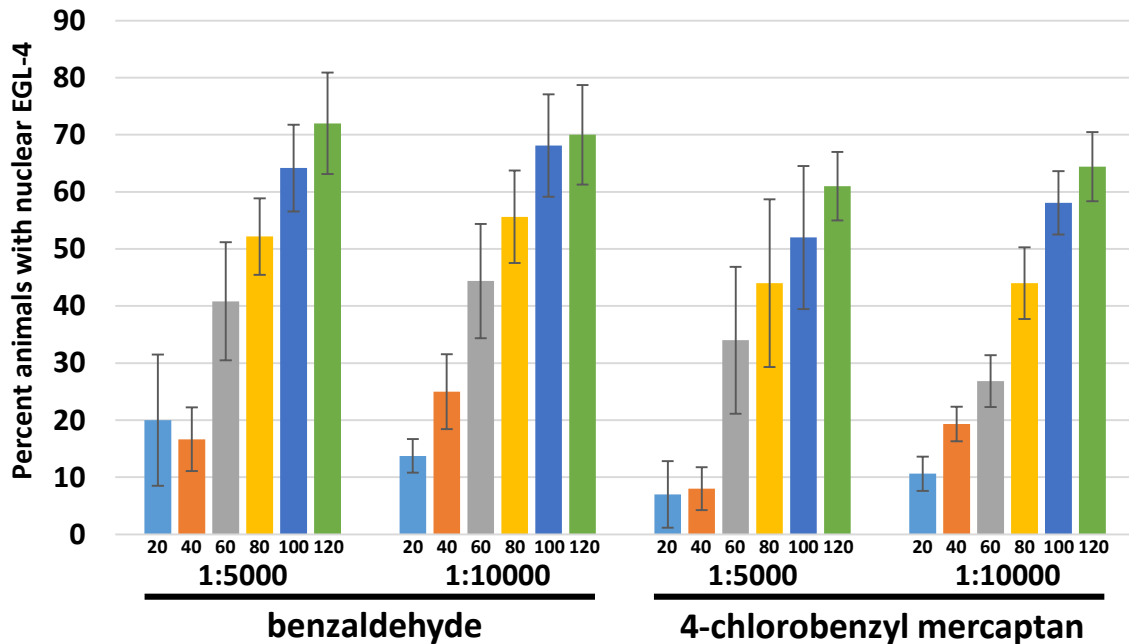

Supplement: peerj-06-4956-s007.pdf [file peerj-06-4956-s007.pdf]
